# Supplementary material for: Two and three input molecular logic operations mediated by a novel azo-azomethine based chromogenic probe through intramolecular charge transfer processes
Source: Royal Society of Chemistry journal article supplement (doi:10.1039/c4nj01723d), 2014-12-09
Supplement: c4nj01723d1.pdf [file c4nj01723d1.pdf]

Electronic Supplementary Material (ESI) for New Journal of Chemistry  
This journal is © The Royal Society of Chemistry 2014

## Supporting Information

### Two and three input molecular logic operations mediated by a novel azo-azomethine based chromogenic probe through intramolecular charge transfer processes

Khatereh Rezaeian and Hamid Khanmohammadi\*

*Department of Chemistry, Faculty of Science, Arak University, Arak 38156-8-8349, Iran*

E-mail: [h-khanmohammadi@araku.ac.ir](mailto:h-khanmohammadi@araku.ac.ir)

| Page No. | Contents                                                                                                                                                                                                                                                                                                         |
|----------|------------------------------------------------------------------------------------------------------------------------------------------------------------------------------------------------------------------------------------------------------------------------------------------------------------------|
| S2       | IR spectrum of 1-(3-Formyl-4-hydroxyphenylazo)-4-nitrobenzene                                                                                                                                                                                                                                                    |
| S3       | <sup>1</sup> H NMR spectrum of 1-(3-Formyl-4-hydroxyphenylazo)-4-nitrobenzene                                                                                                                                                                                                                                    |
| S4       | IR spectrum of <b>1</b>                                                                                                                                                                                                                                                                                          |
| S5       | <sup>1</sup> H NMR spectrum of <b>1</b>                                                                                                                                                                                                                                                                          |
| S6       | UV-Vis titrations of <b>1</b> with (A) TBAOAc and (B) TBAH <sub>2</sub> PO <sub>4</sub> in 9:1, DMSO-water                                                                                                                                                                                                       |
| S7       | Benesi Hildebrand plots for titration of <b>1</b> with anions in 9:1, DMSO-water                                                                                                                                                                                                                                 |
| S8       | Job's plot for <b>1</b> with anions in 9:1, DMSO-water                                                                                                                                                                                                                                                           |
| S9       | <sup>1</sup> H NMR spectra of <b>1</b> in DMSO- <i>d</i> <sub>6</sub> (2×10 <sup>-2</sup> mol L <sup>-1</sup> ) in the absence and presence of TBAF                                                                                                                                                              |
| S10      | UV-Vis titration of <b>1</b> with TBAOH in 9:1, DMSO-water                                                                                                                                                                                                                                                       |
| S11      | UV-Vis titrations of <b>1</b> with (A) Co <sup>2+</sup> and (B) Ni <sup>2+</sup> cations in 9:1, DMSO-water                                                                                                                                                                                                      |
| S12      | Benesi Hildebrand plots for titration of <b>1</b> with cations in 9:1, DMSO-water                                                                                                                                                                                                                                |
| S13      | Job's plot for <b>1</b> with cations in 9:1, DMSO-water                                                                                                                                                                                                                                                          |
| S14      | FT-IR spectrum of <b>1</b> -Zn <sup>2+</sup>                                                                                                                                                                                                                                                                     |
| S15      | FT-IR spectrum of <b>1</b> -Cu <sup>2+</sup>                                                                                                                                                                                                                                                                     |
| S16      | Reversible absorbance titration responses of receptor <b>1</b> (2×10 <sup>-5</sup> mol L <sup>-1</sup> ) binding to F <sup>-</sup> (5 equiv.) by the introduction of Ca <sup>2+</sup> (5 equiv.) to the system. The cyclic index is the number of alternating cycles.                                            |
| S17      | Reversible absorbance titration responses of receptor <b>1</b> (2×10 <sup>-5</sup> mol L <sup>-1</sup> ) binding to (A) Zn <sup>2+</sup> (5 equiv.) and (B) Cu <sup>2+</sup> (5 equiv.) by the introduction of EDTA (sodium salt, 5 equiv.) to the system. The cyclic index is the number of alternating cycles. |

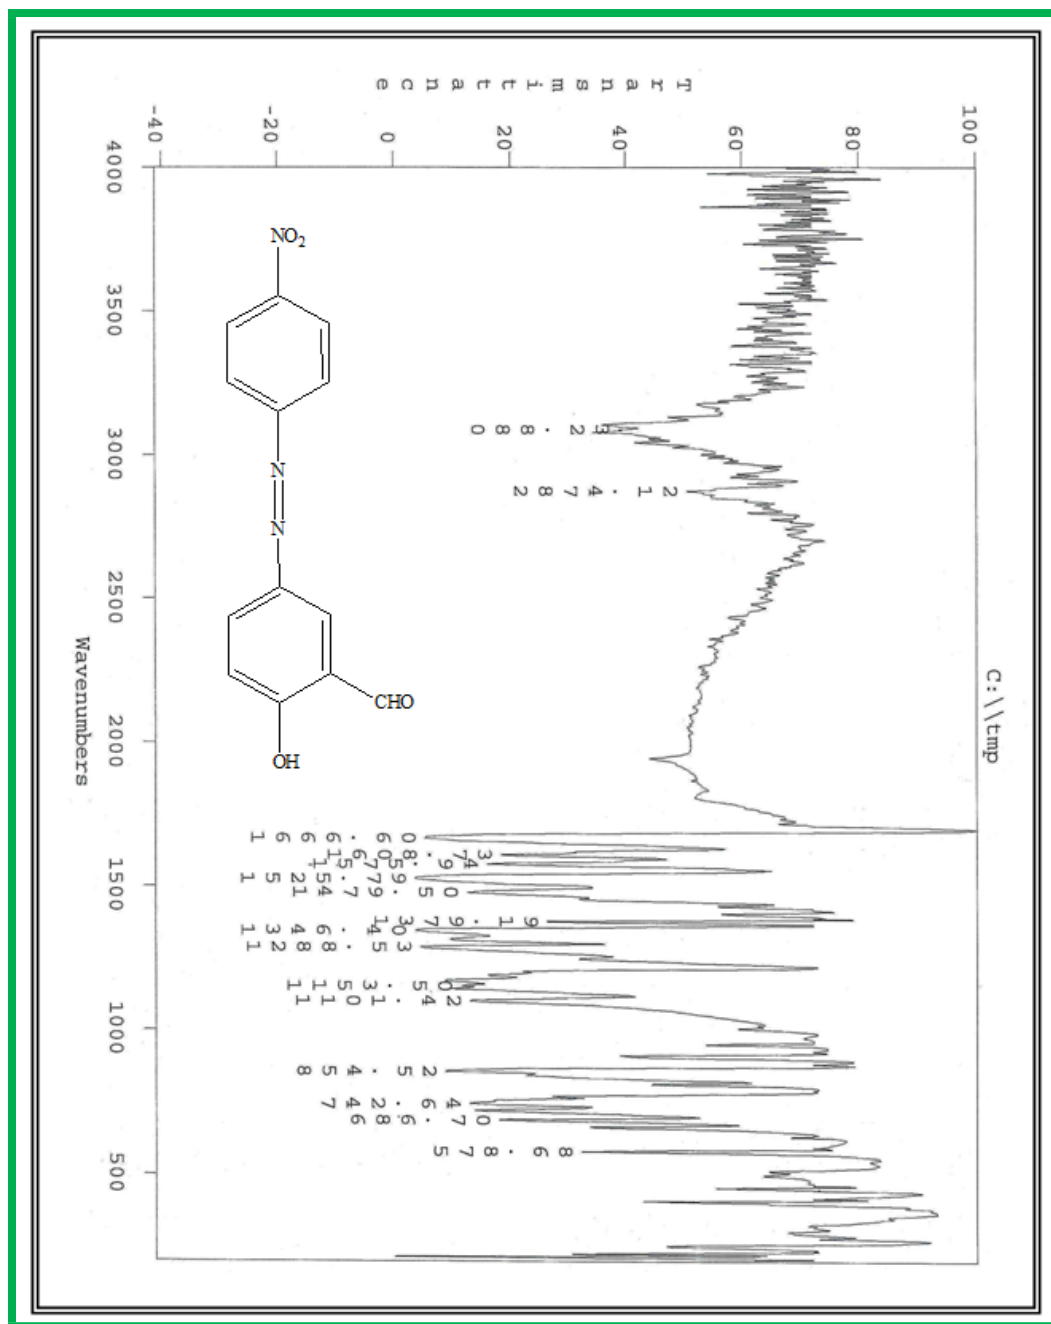

Figure S1. IR spectrum of 1-(3-Formyl-4-hydroxyphenylazo)-4-nitrobenzene

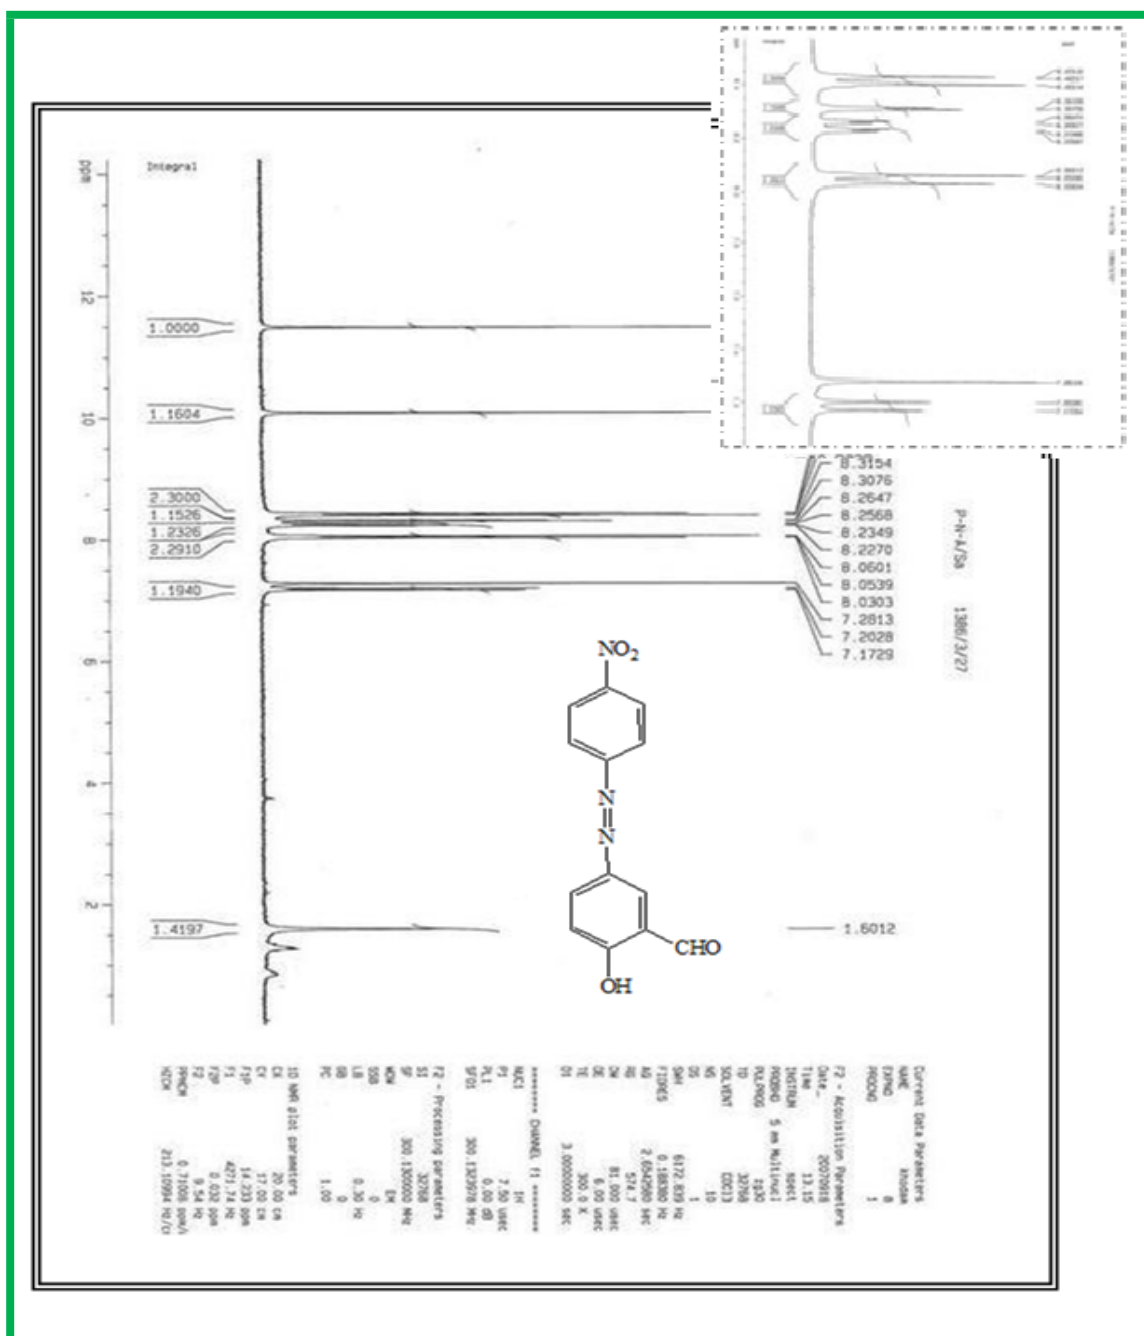

Figure S2. <sup>1</sup>H NMR spectrum of 1-(3-Formyl-4-hydroxyphenylazo)-4-nitrobenzene

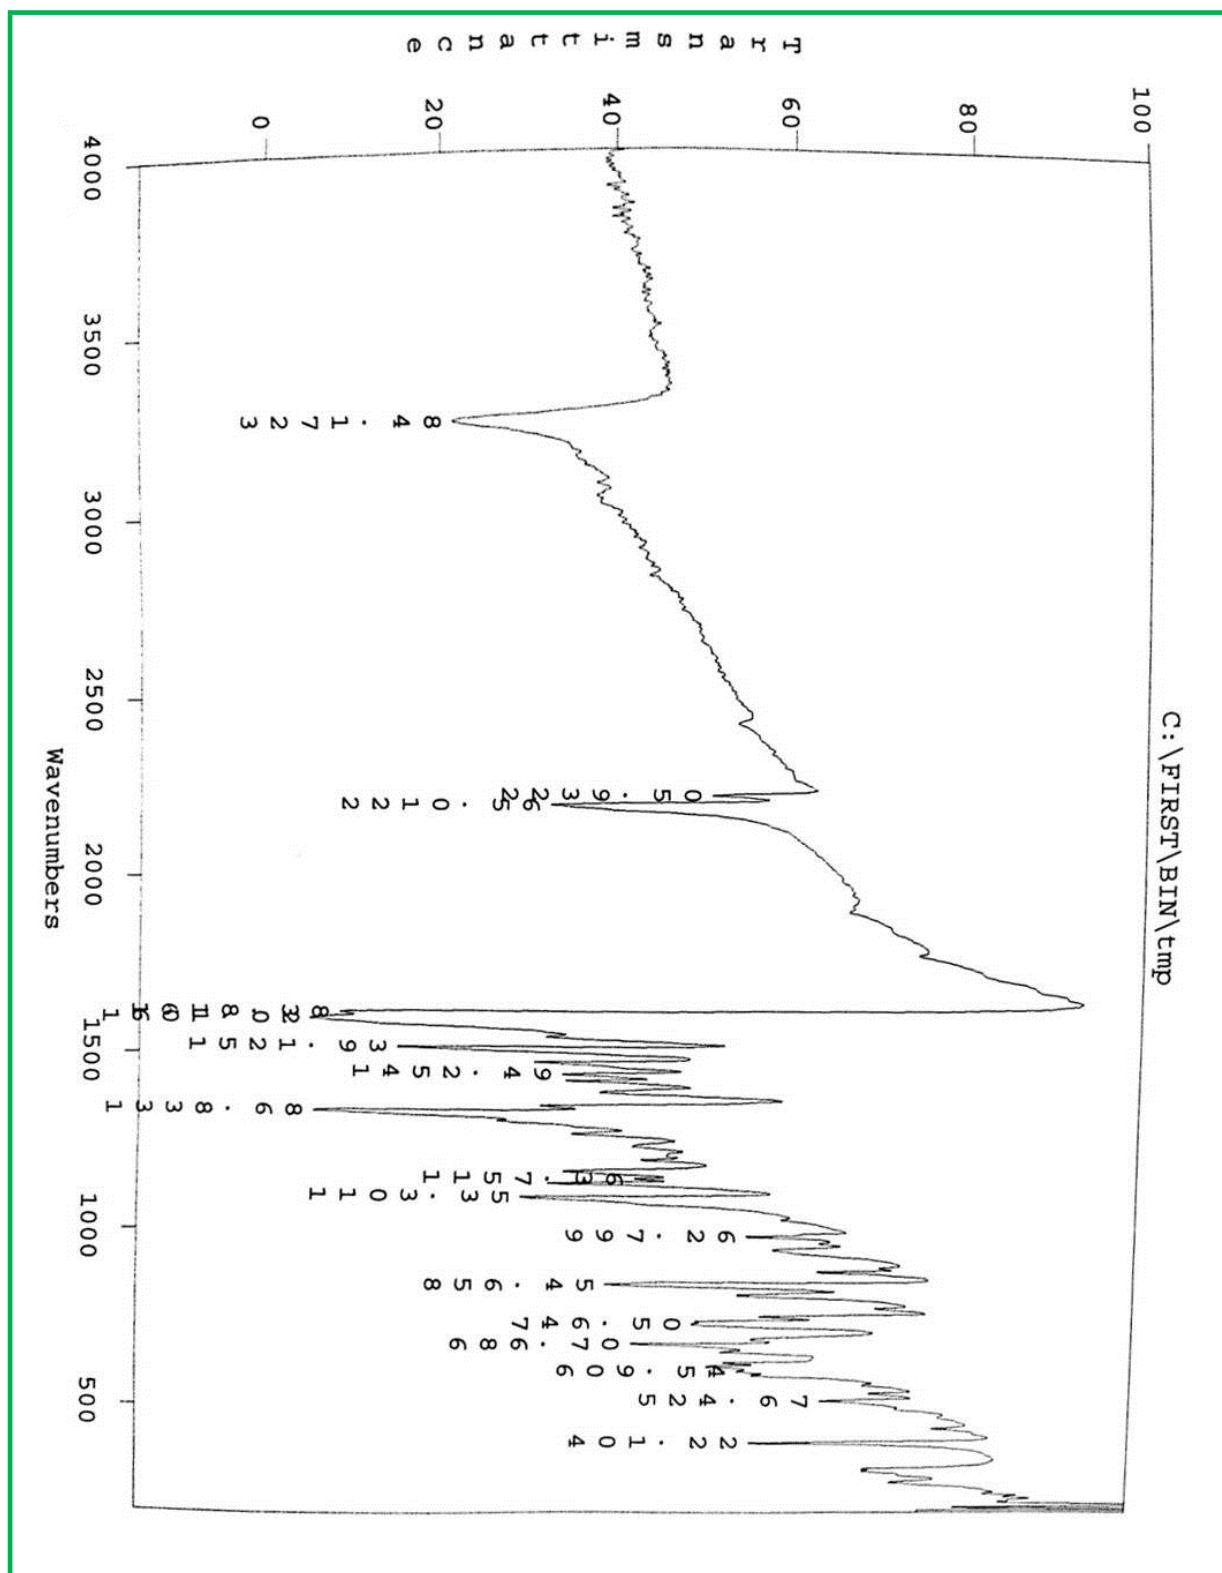

Figure S3. IR spectrum of 1

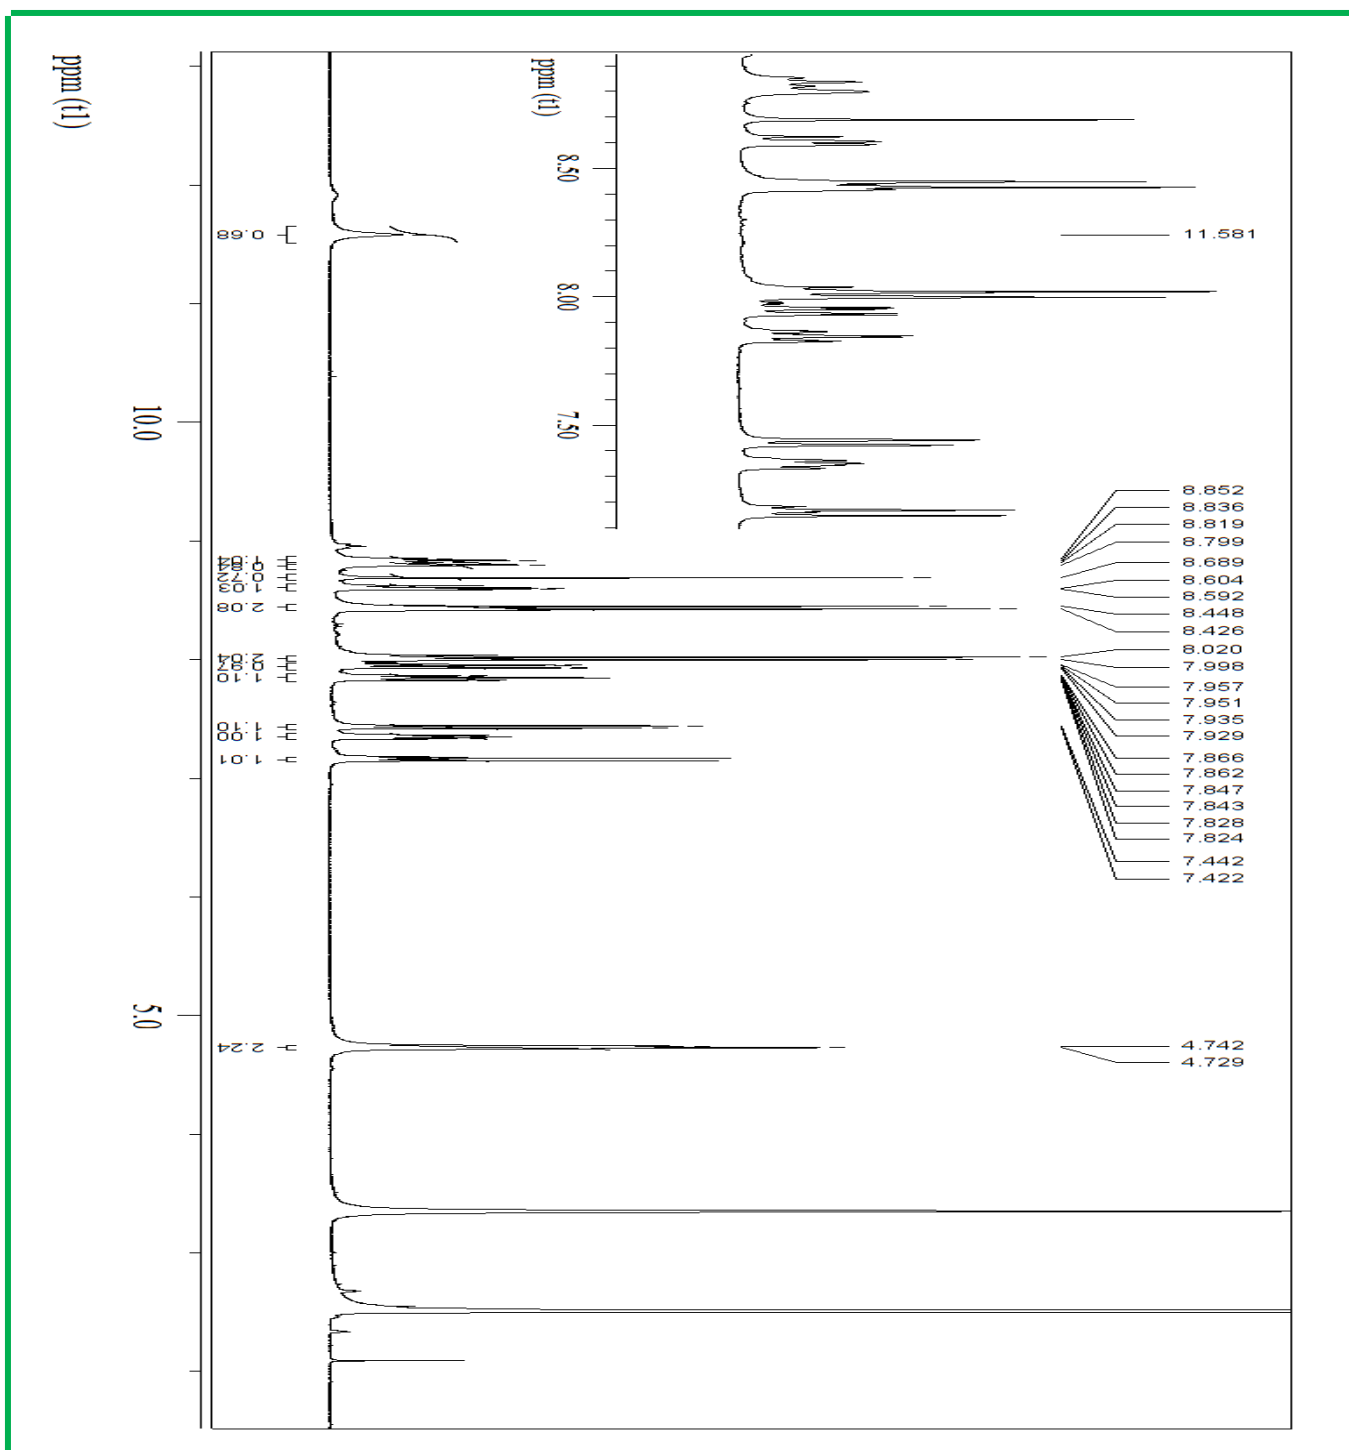

Figure S4.  $^1\text{H}$  NMR spectrum of **1**

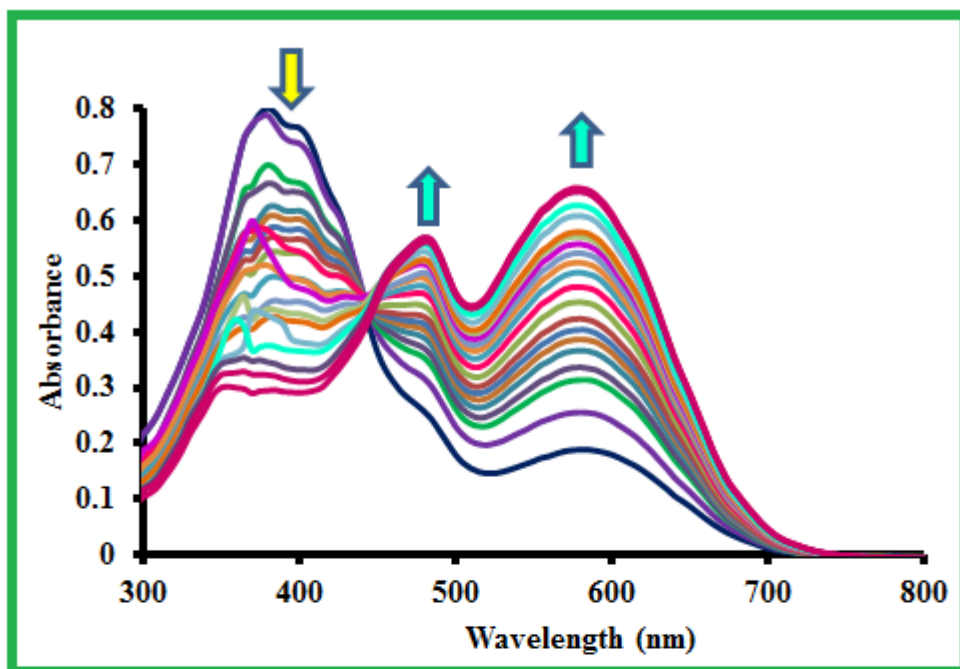

(A)

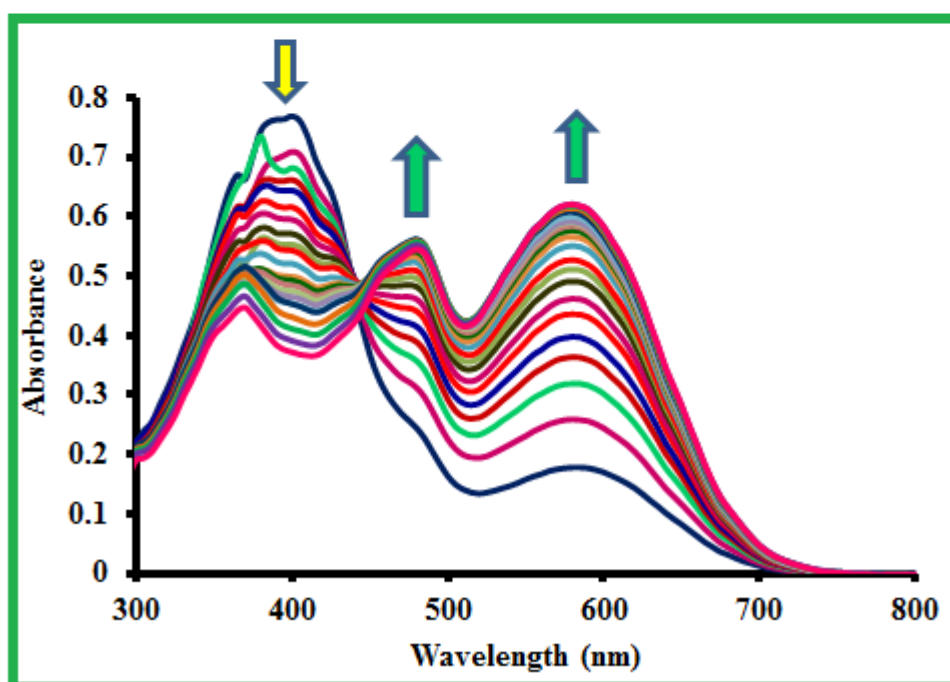

(B)

**Figure S5.** UV-Vis absorption spectra of sensor 1 (2 × 10<sup>-5</sup> mol L<sup>-1</sup>) in 9:1, DMSO-water upon addition of (A) TBAOAc and (B) TBAH<sub>2</sub>PO<sub>4</sub> (0-5 equiv.).

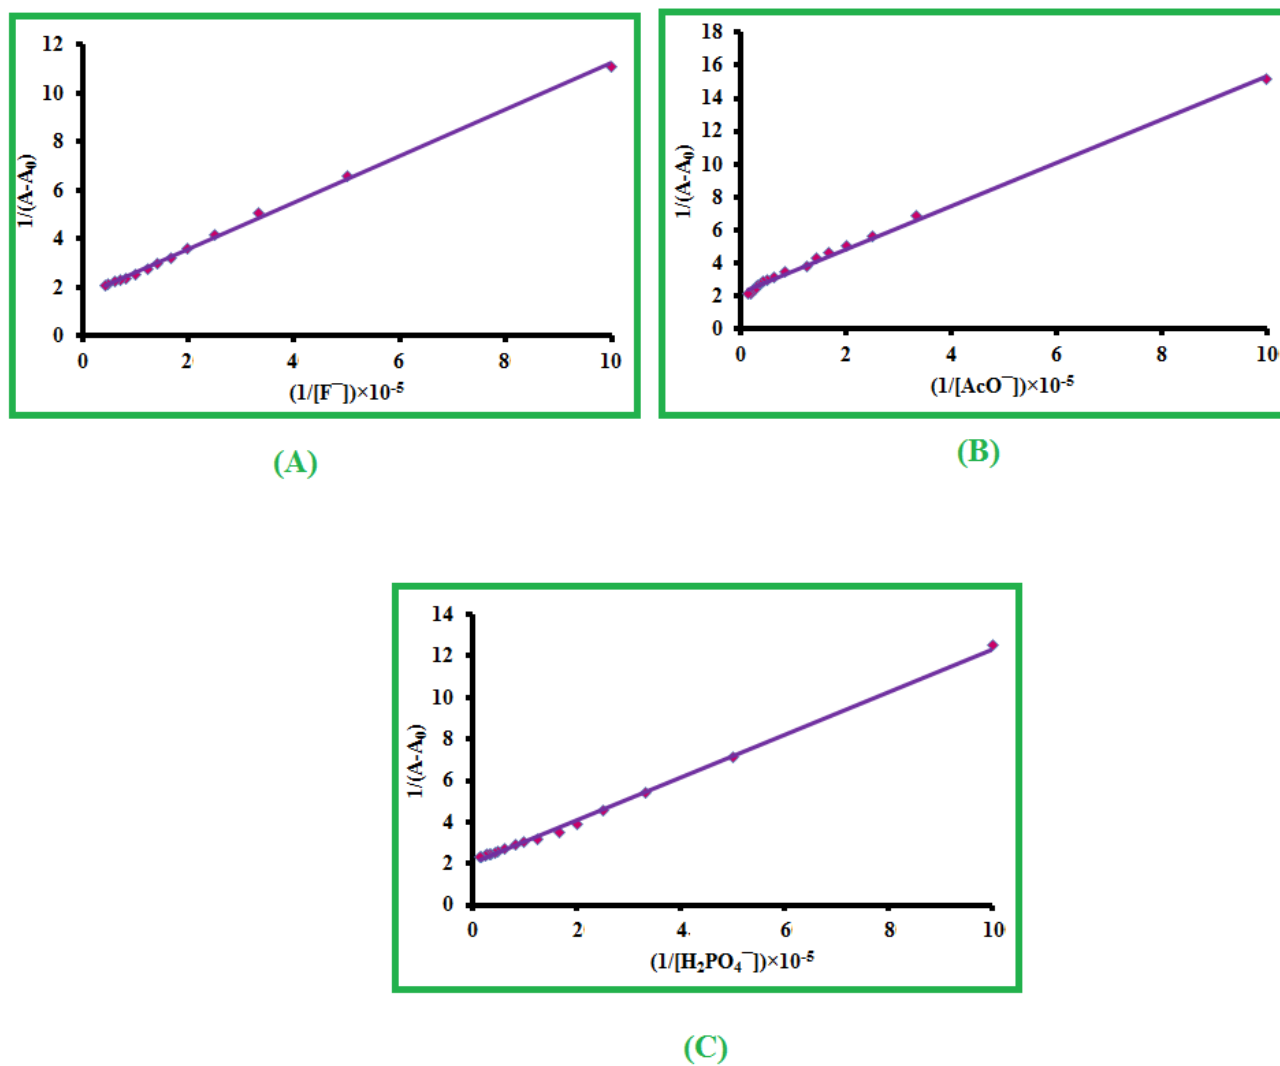

**Figure S6.** Benesi–Hildebrand plots of receptor **1** with (A) TBAF, (B) TBAOAc and (C) TBAH<sub>2</sub>PO<sub>4</sub> associated with absorbance change at 585 nm in 9:1, DMSO-water.

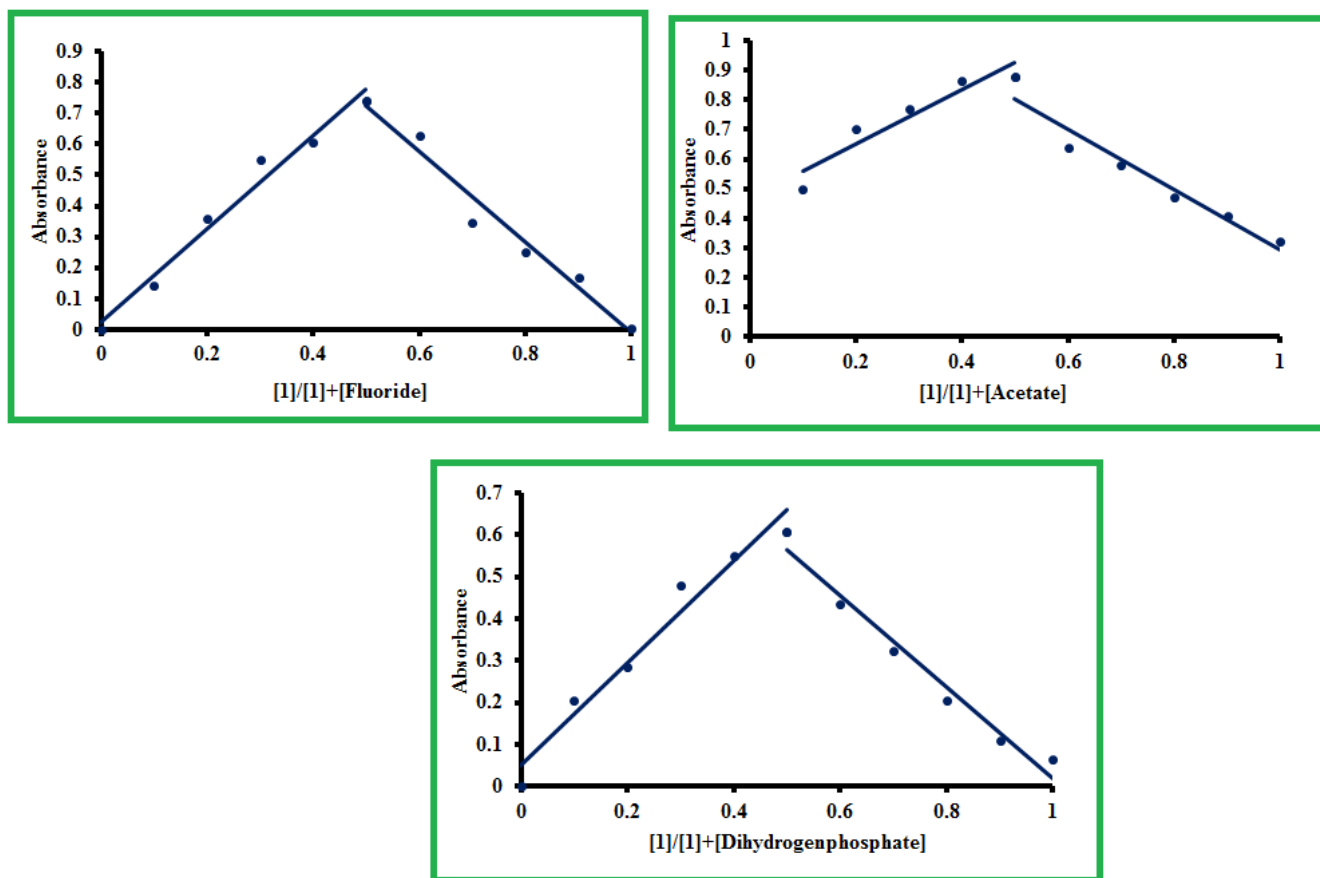

**Figure S7.** Job's plot for sensor 1 and anions with a total concentration of  $2.0 \times 10^{-5}$  M in 9:1, DMSO-water at 585 nm.



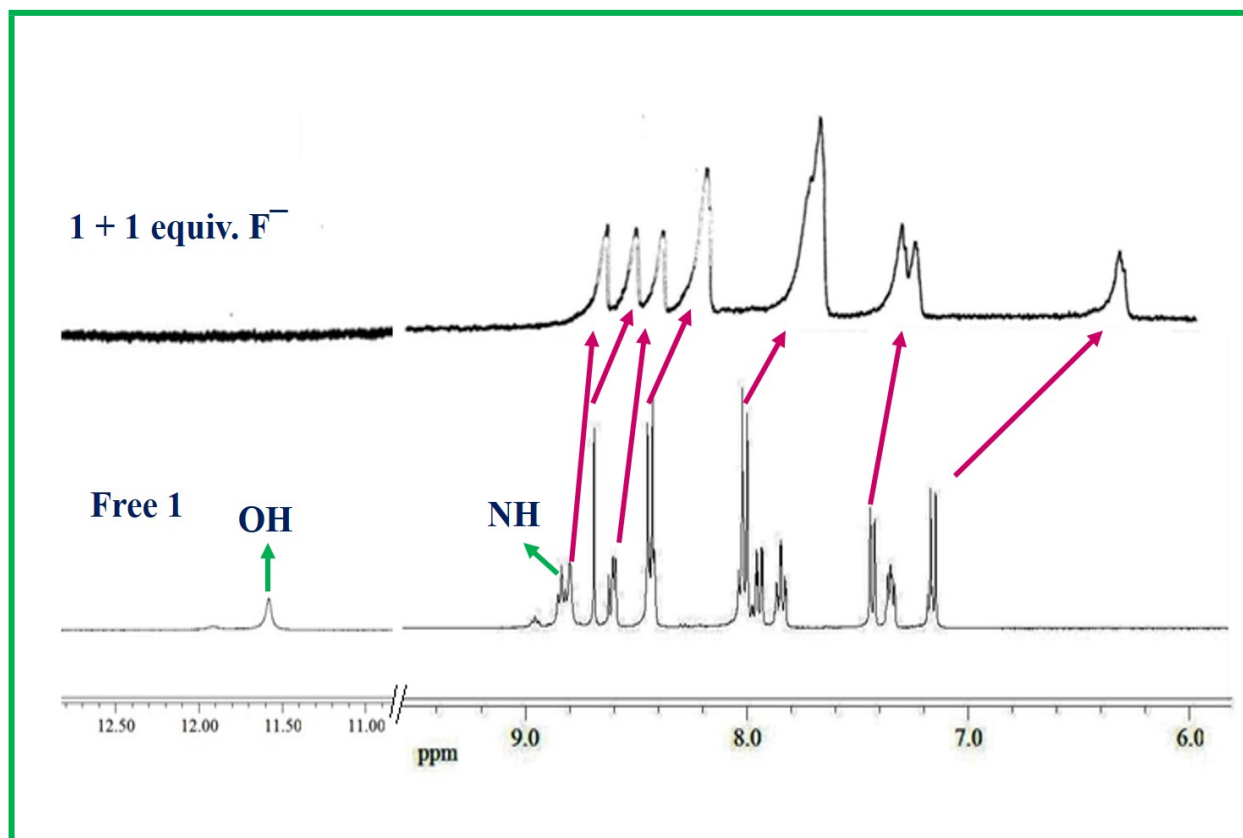

**Figure S8.** <sup>1</sup>H NMR spectra of 1 in DMSO-*d*<sub>6</sub> ( $2 \times 10^{-2}$  mol L<sup>-1</sup>) in the absence and presence of TBAF

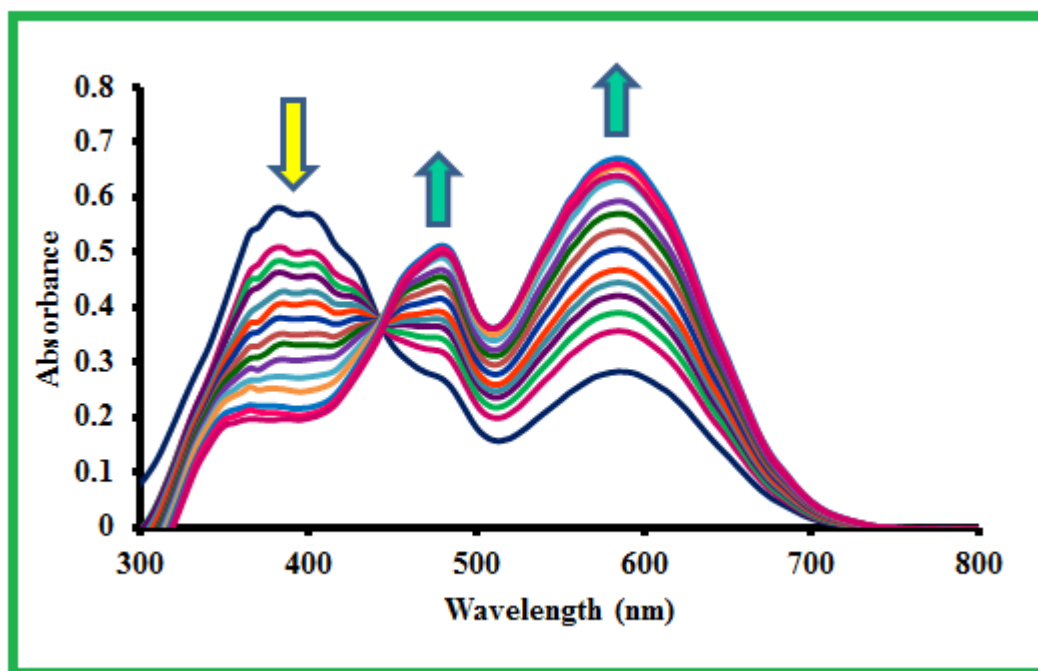

**Figure S9.** UV-Vis absorption spectra of sensor **1** ( $2 \times 10^{-5}$  mol L<sup>-1</sup>) in 9:1, DMSO-water upon addition of TBAOH.

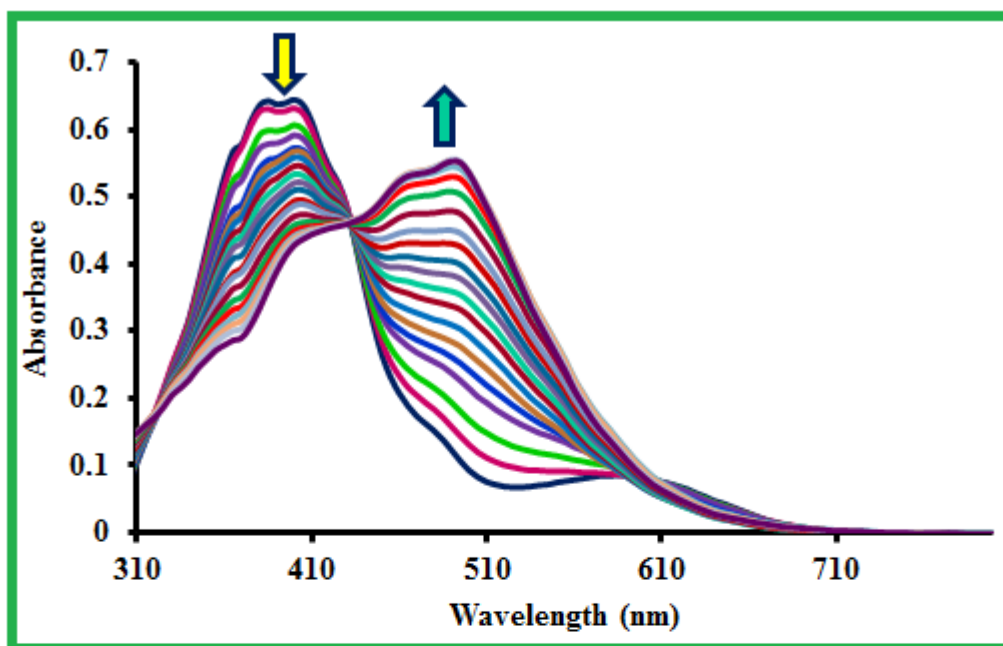

(A)

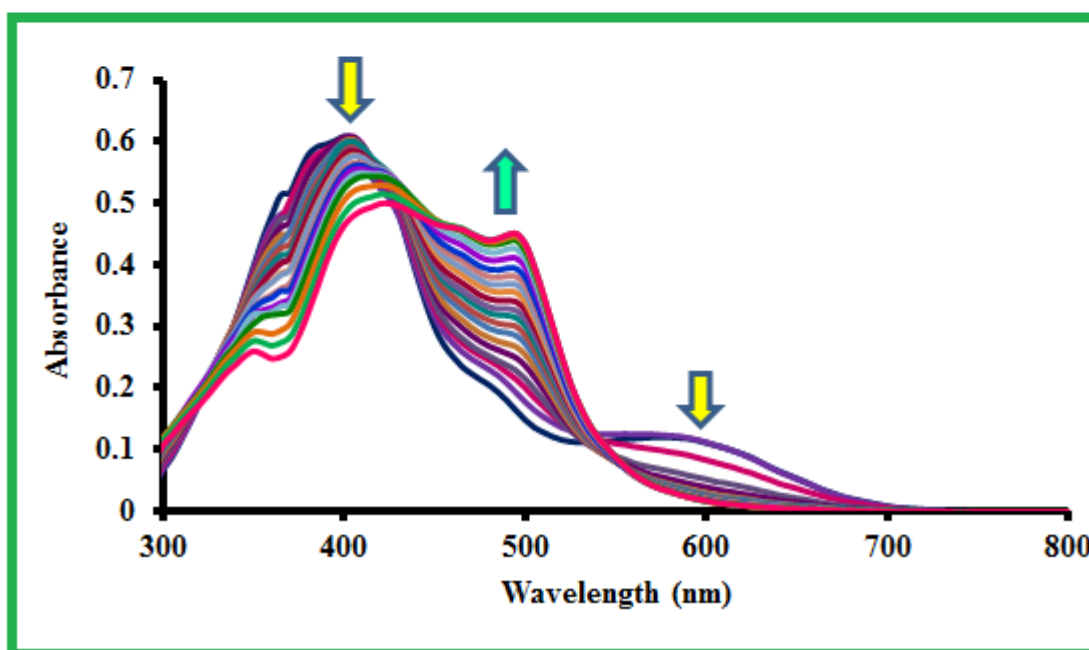

(B)

**Figure S10.** UV-Vis absorption spectra of receptor 1 (2 × 10<sup>-5</sup> mol L<sup>-1</sup>) in 9:1, DMSO-water upon addition of (A) Co<sup>2+</sup> and (B) Ni<sup>2+</sup> cations (0-5 equiv.).

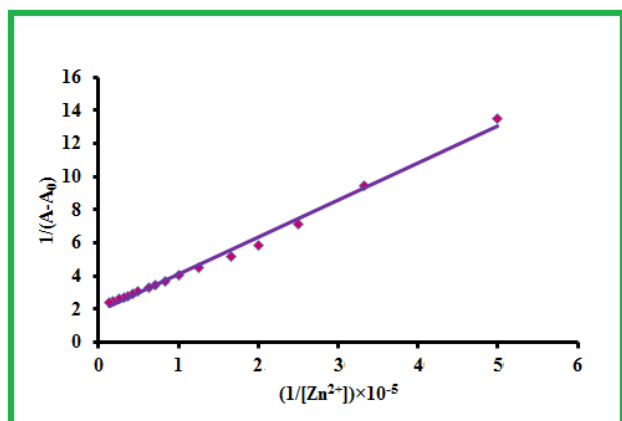

(A)

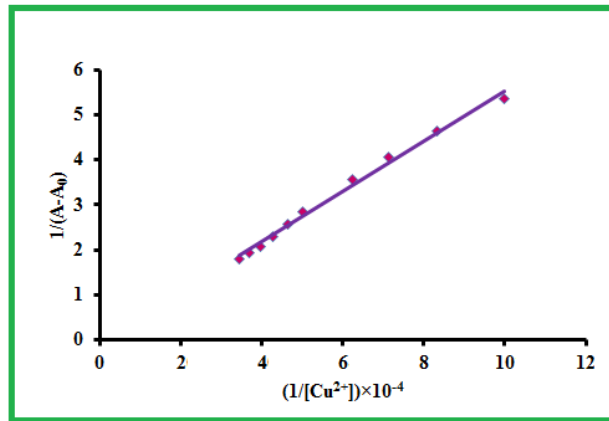

(B)

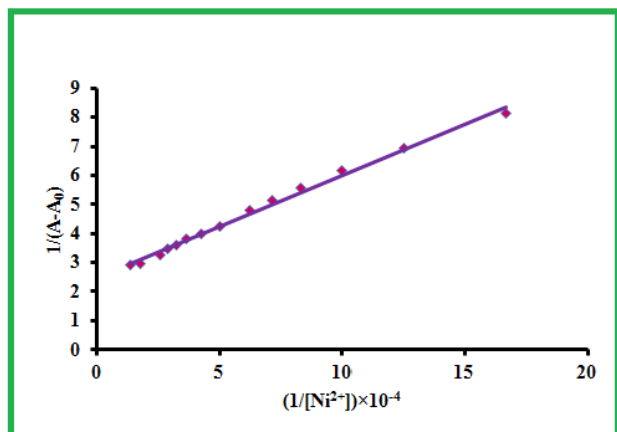

(C)

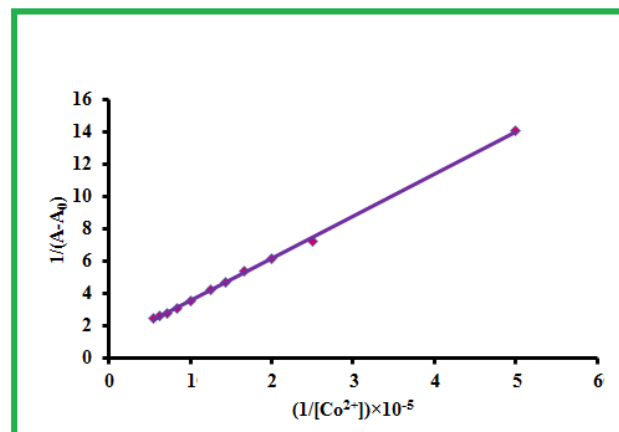

(D)

**Figure S11.** Benesi-Hildebrand plots of receptor **1** with (A) Zn<sup>2+</sup>, (B) Cu<sup>2+</sup>, (C) Ni<sup>2+</sup> and (D) Co<sup>2+</sup> cations associated with absorbance change at 495 nm in 9:1, DMSO-water.

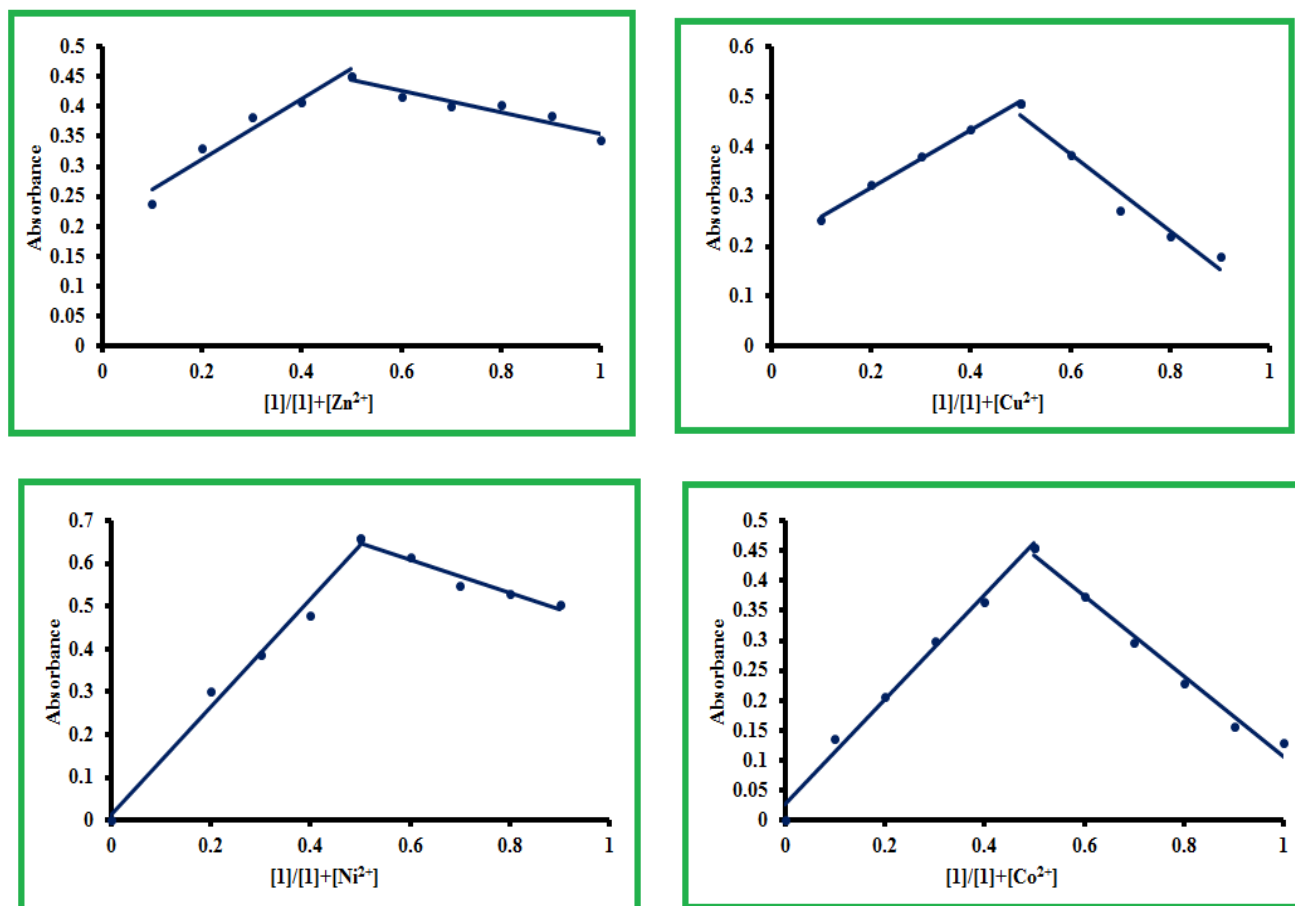

**Figure S12.** Job's plot for receptor 1 and cations with a total concentration of  $2.0 \times 10^{-5}$  M in 9:1, DMSO-water at 495 nm.

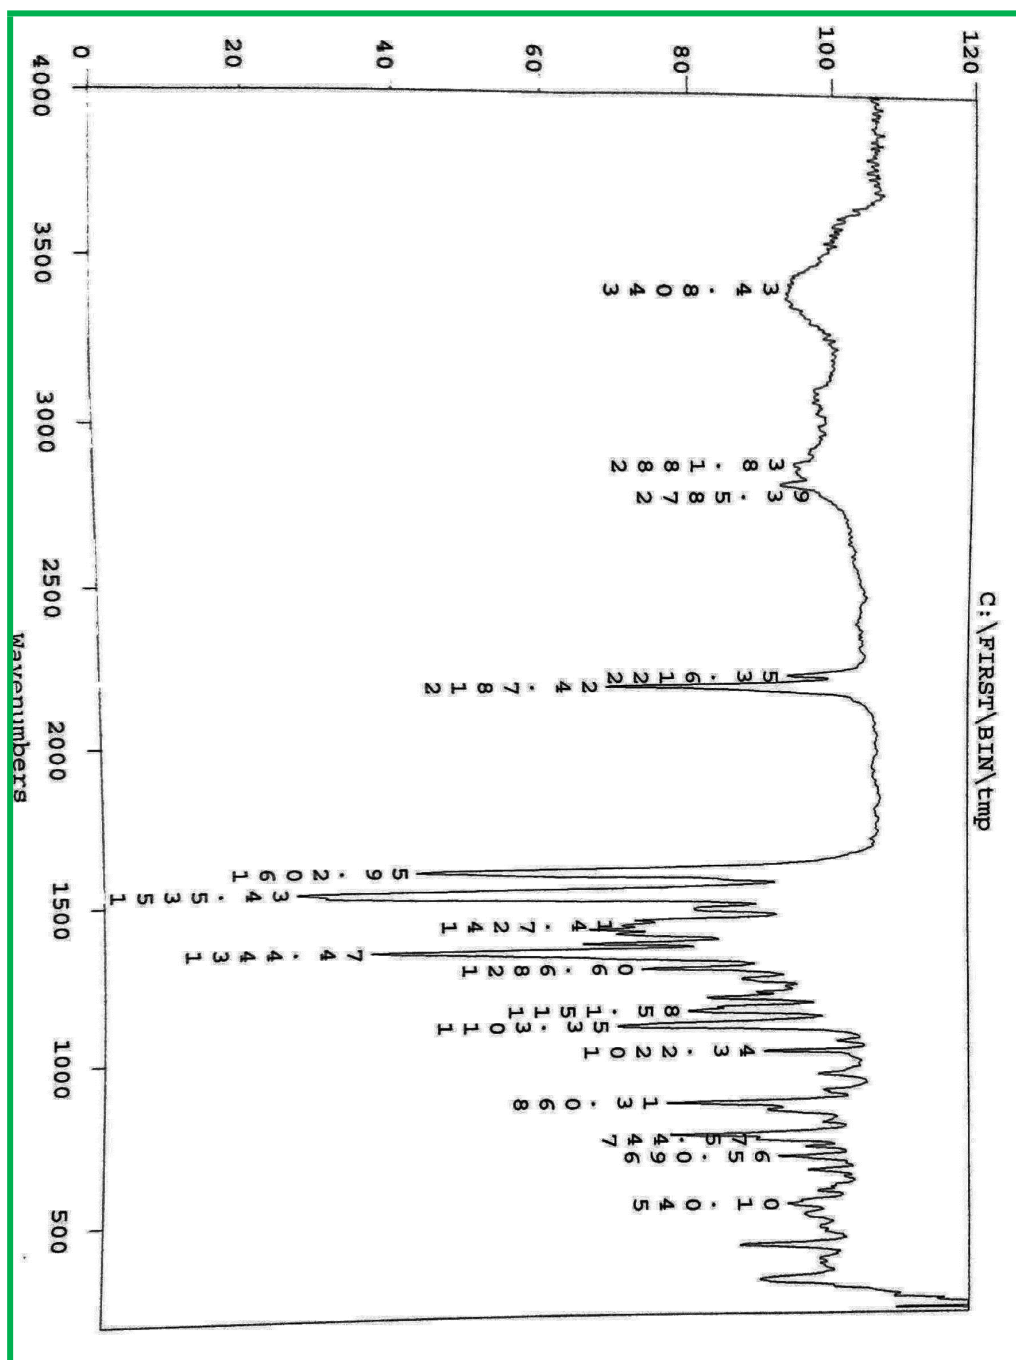

Figure S13. FT-IR spectrum of 1-Zn<sup>2+</sup>

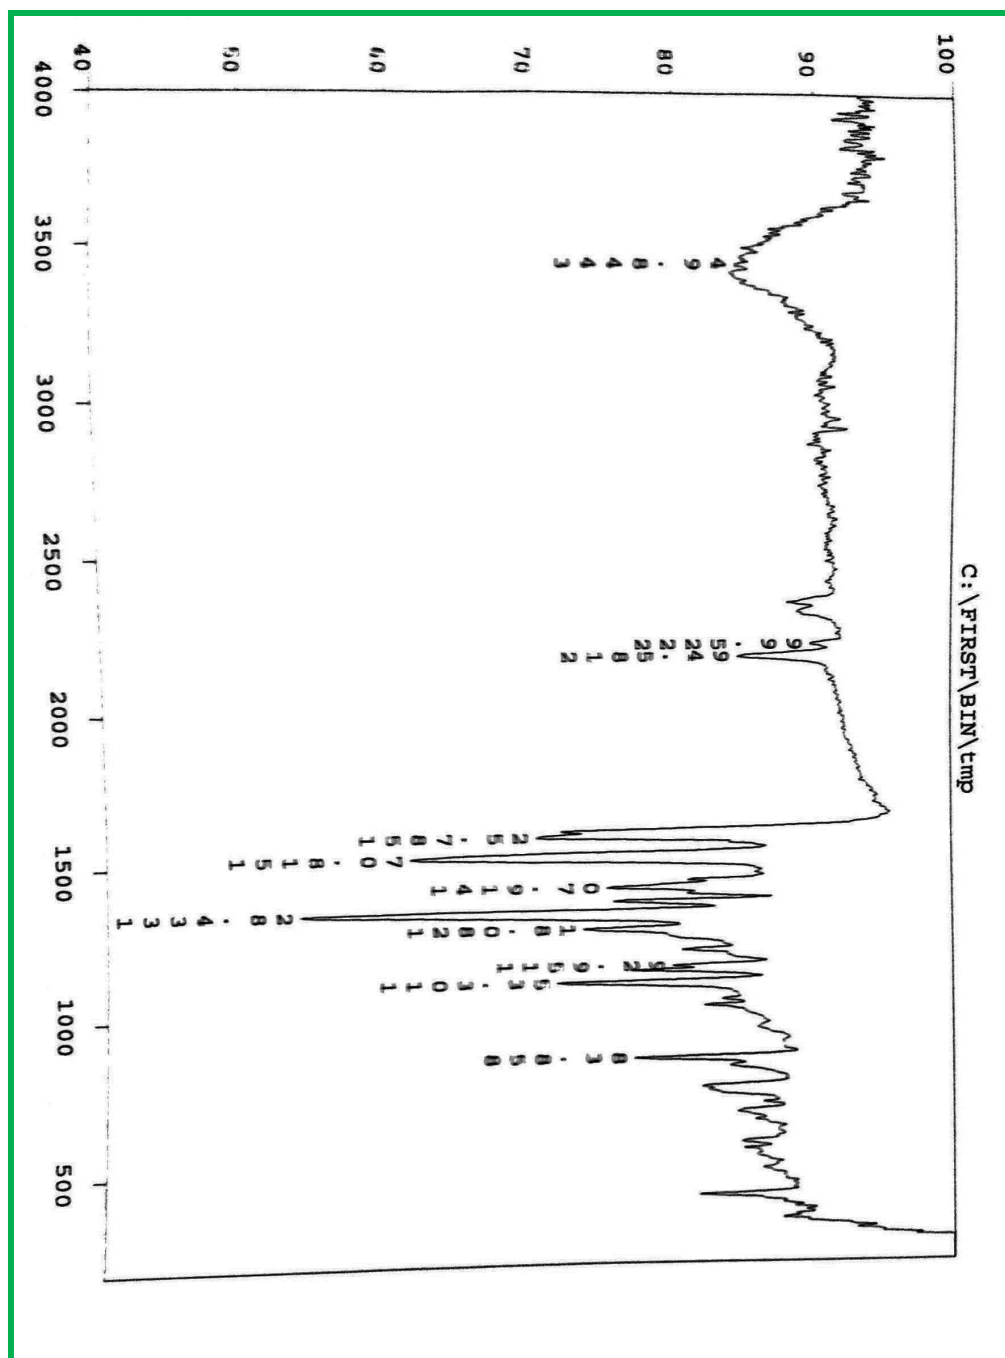

Figure S14. FT-IR spectrum of 1-Cu<sup>2+</sup>

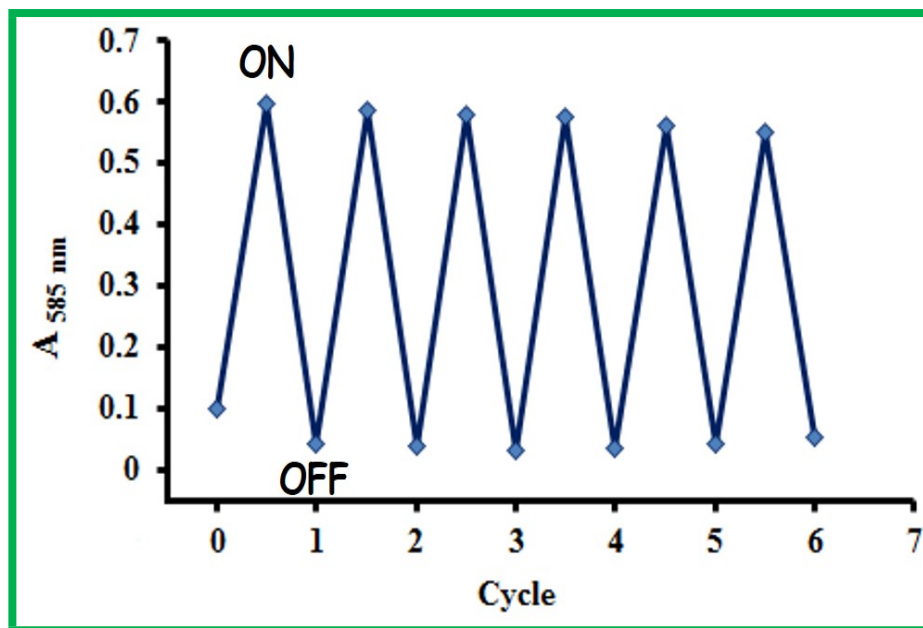

**Figure S15.** Reversible absorbance titration responses of receptor **1** ( $2 \times 10^{-5}$  mol L<sup>-1</sup>) binding to F<sup>-</sup> (5 equiv.) by the introduction of Ca<sup>2+</sup> (5 equiv.) to the system. The cyclic index is the number of alternating cycles.



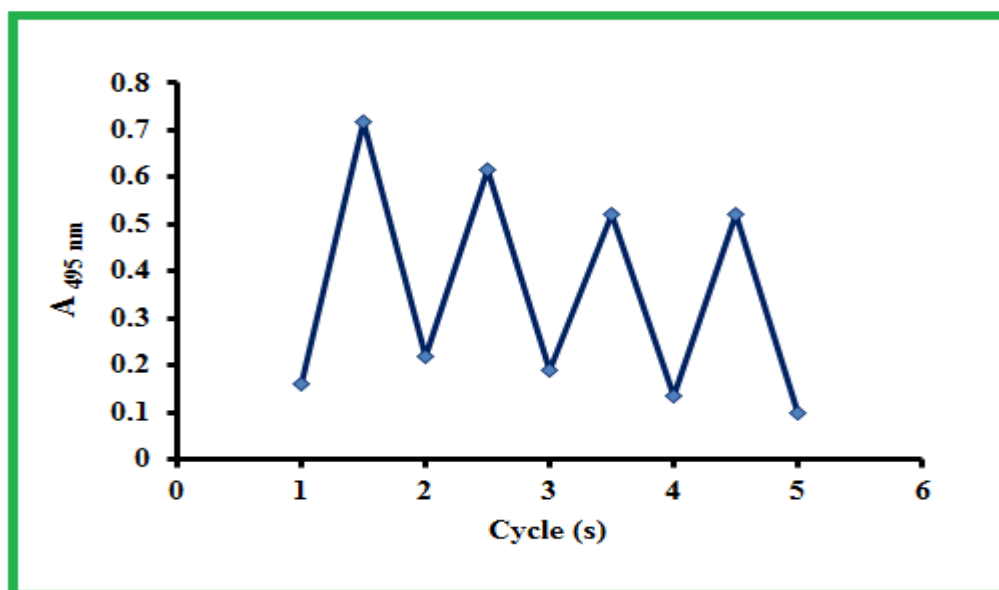

(A)

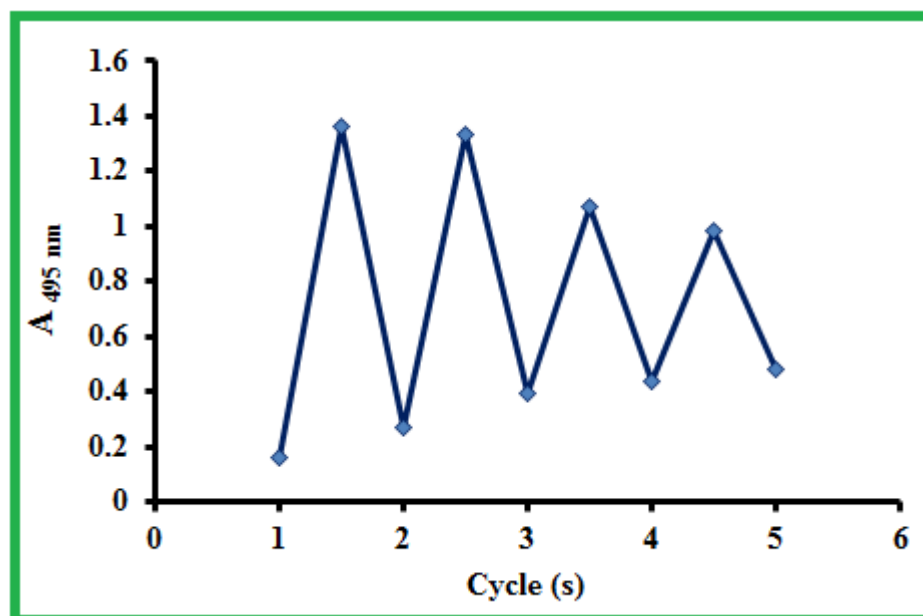

(B)

**Figure S16.** Reversible absorbance titration responses of receptor **1** ( $2 \times 10^{-5}$  mol L<sup>-1</sup>) binding to (A) Zn<sup>2+</sup> (5 equiv.) and (B) Cu<sup>2+</sup> (5 equiv.) by the introduction of EDTA (sodium salt, 5 equiv.) to the system. The cyclic index is the number of alternating cycles.
